# Supplementary material for: Efficient synthesis of an unsupported aryl substituted iminoborane chain (HNArBH)2NAr (Ar = [1,1′-biphenyl]-2-yl)
Source: Royal Society of Chemistry journal article supplement (doi:10.1039/d4dt02280g), 2024-01-01
Supplement: d4dt02280g1.pdf [file d4dt02280g1.pdf]

## Electronic Supporting Information

### Efficient Synthesis of an Unsupported Aryl Substituted Iminoborane Chain (HNArBH)<sub>2</sub>NAr (Ar = [1,1'-biphenyl]-2-yl)

Rita Stauder,<sup>a</sup> Markus Ströbele<sup>b</sup> and Holger F. Bettinger<sup>a</sup>

<sup>a</sup> *Institut für Organische Chemie, Universität Tübingen, Auf der Morgenstelle 18, 72076 Tübingen, Germany*

<sup>b</sup> *Institut für Anorganische Chemie, Universität Tübingen, Auf der Morgenstelle 18, 72076 Tübingen, Germany*

#### Contents

|                                 |   |
|---------------------------------|---|
| I. Experimental Details .....   | 2 |
| General .....                   | 2 |
| Synthesis.....                  | 2 |
| II. Spectra .....               | 3 |
| III. X-ray crystallography..... | 6 |

## I. Experimental Details

### General

All reactions were carried out under an inert atmosphere using argon as protective gas. 2-Aminobiphenyl was purchased from TCI Chemicals and triethylamine borane from Alfa Aesar. Acetonitrile was bought in HPLC grade from Sigma Aldrich. All chemicals were used without further purification. The NMR spectra were recorded on Bruker Avance II 400 in CD<sub>2</sub>Cl<sub>2</sub> (bought from Sigma Aldrich, dried over molecular sieve).

### Synthesis

**Oligo iminoborane 1.** 2-Aminobiphenyl (152 mmol) and triethylamine borane (151 mmol) were slowly heated to 165 °C over a period of two hours and held at this temperature for further 5.5 hours. The triethylamine released in this reaction was then distilled *in vacuo*, and the remaining solid matter was recrystallized from acetonitrile giving pure product as colorless crystals (57 %).

<sup>1</sup>H (400,16 MHz, CD<sub>2</sub>Cl<sub>2</sub>): 4.32–5.26 (m, 2H), 5.38-5.60 (m, 2H), 6.63-6.70 (m, 2H), 6.76-6.80 (m, 1H), 6.89-6.95 (m, 2H), 6.95-7.00 (m, 2H), 7.00-7.28(m, 19H), 7.38-7.43 (m, 2H).

<sup>13</sup>C{<sup>1</sup>H} (100.62 MHz, CD<sub>2</sub>Cl<sub>2</sub>): 116.5, 121.5, 127.1, 127.2, 127.4, 128.0, 128.8, 129.0, 129.1, 129.2, 129.3, 130.5, 131.2, 131.8, 139.1, 139.5, 139.6, 141.3.

<sup>11</sup>B{<sup>1</sup>H} (128.39 MHz, CD<sub>2</sub>Cl<sub>2</sub>): 31.3.

HR-APCI-MS: m/z: calc. 528.27888, found 528.27844.

## II. Spectra

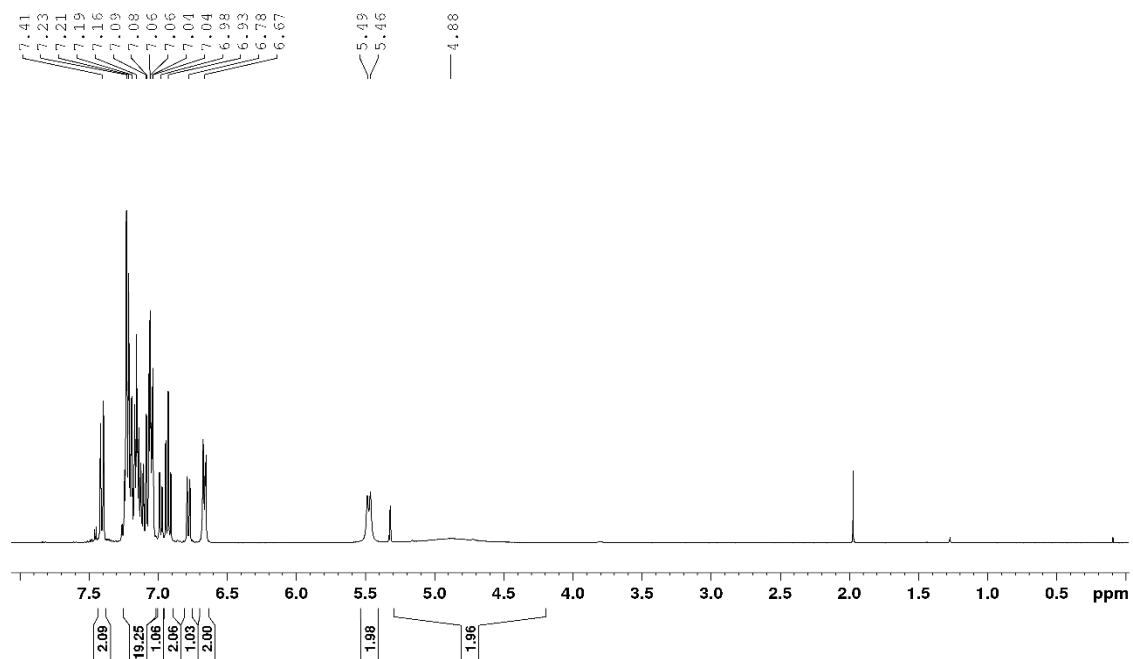

Figure S1.  $^1\text{H}$  NMR (400,16 MHz,  $\text{CD}_2\text{Cl}_2$ ) of **1**

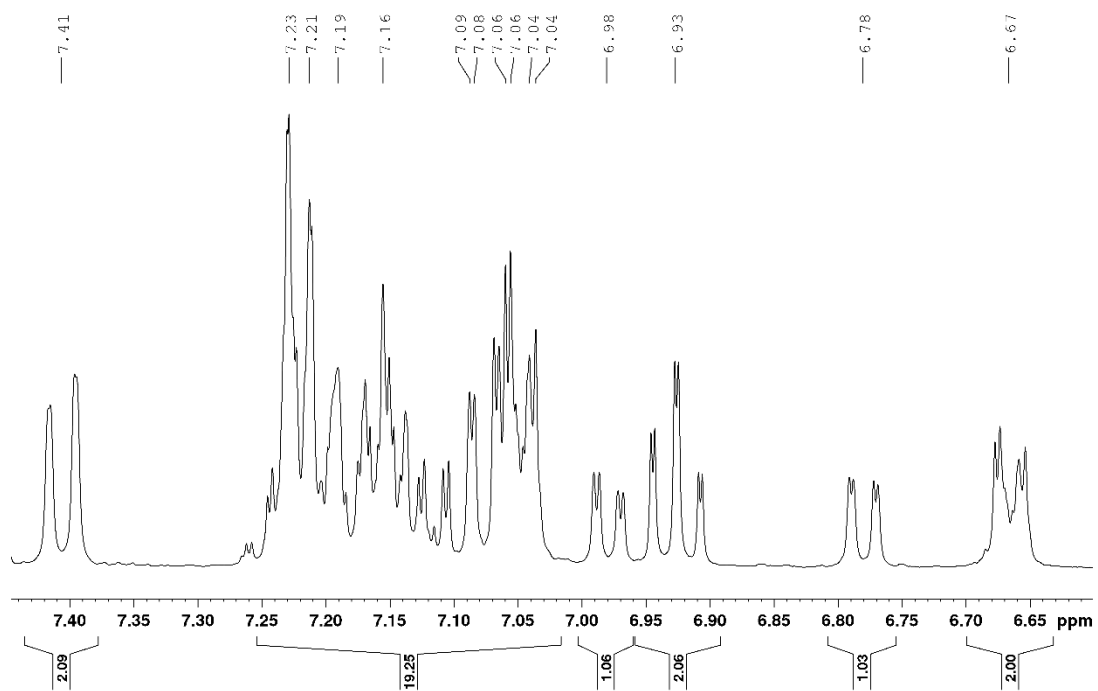

Figure S2.  $^1\text{H}$  NMR (400.16 MHz,  $\text{CD}_2\text{Cl}_2$ ) of **1**, detail aromatic region

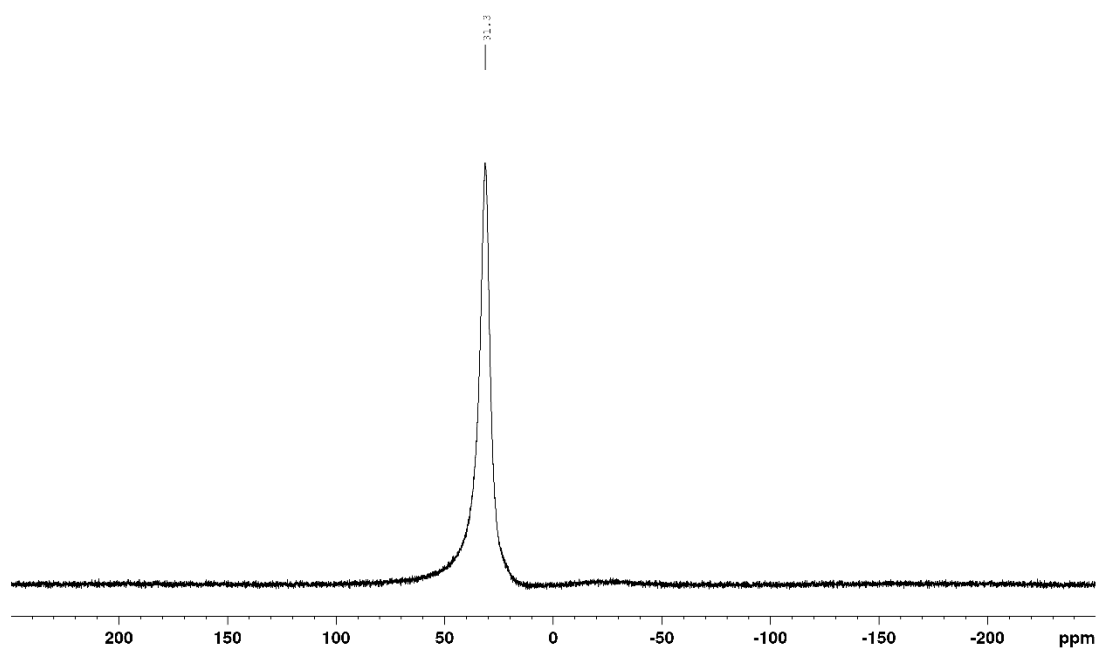

Figure S3.  $^{11}\text{B}\{^1\text{H}\}$  NMR (128.39 MHz,  $\text{CD}_2\text{Cl}_2$ )

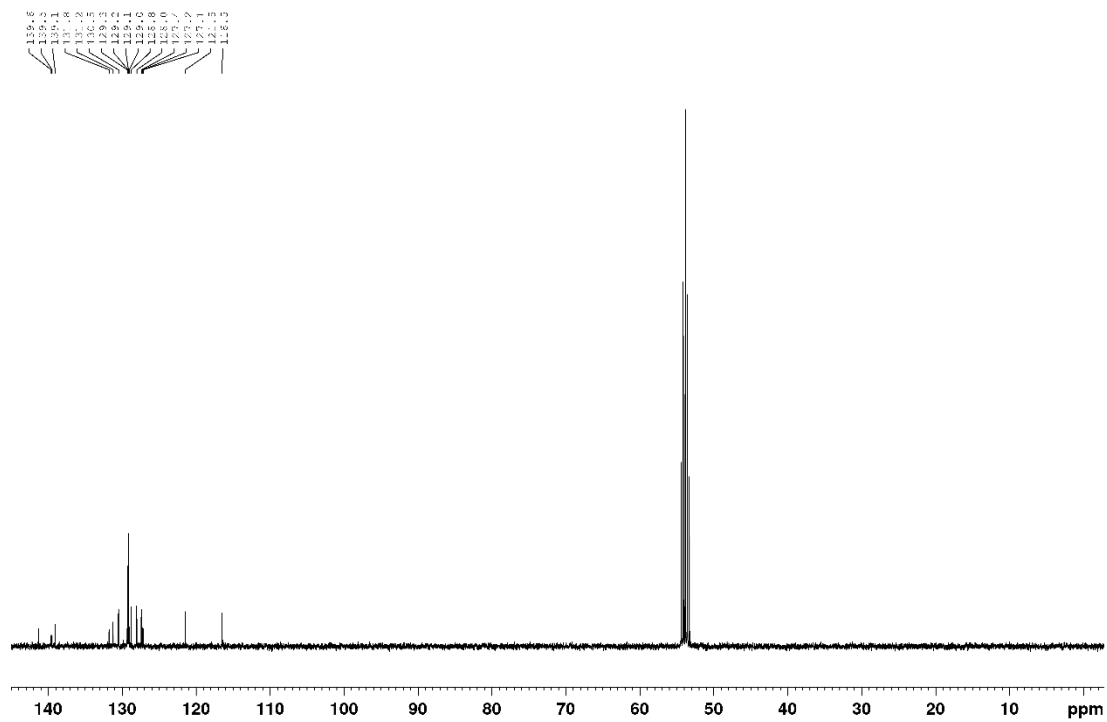

Figure S4.  $^{13}\text{C}$  NMR (100.62 MHz,  $\text{CD}_2\text{Cl}_2$ )

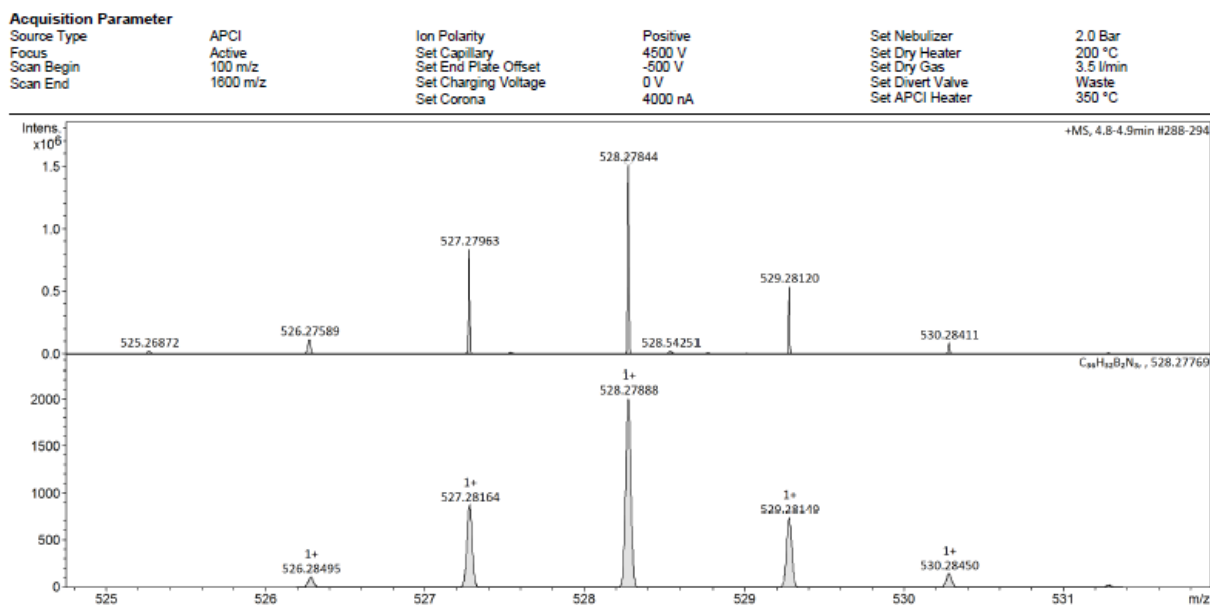

**Figure S5.** HR-APCI-MS calculated (bottom), found (top)

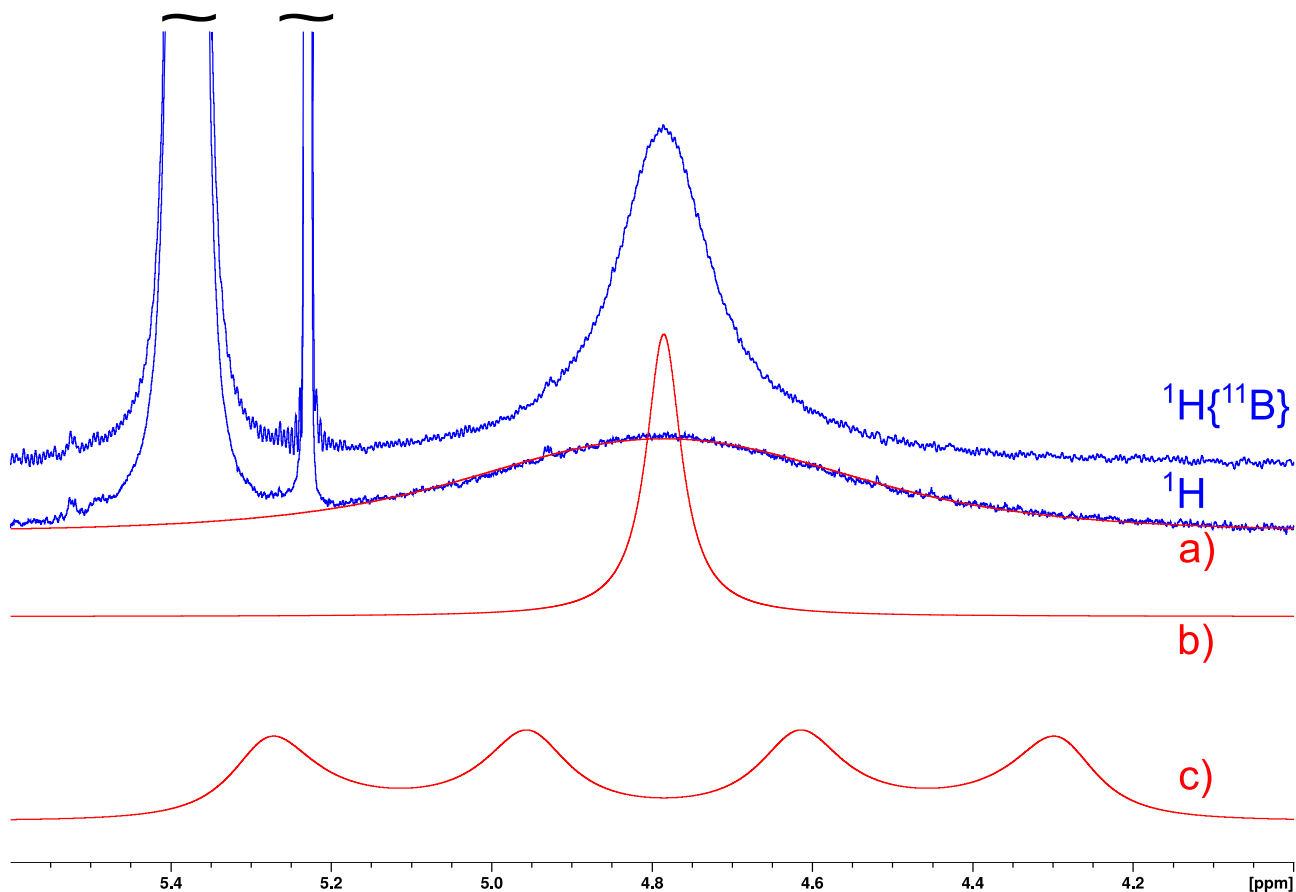

**Figure S6.** Experimental (blue) and calculated (red) 300.13 MHz  $^1\text{H}$  NMR spectra of the proton directly bonded to the boron atom. The experimental  $^1\text{H}$  spectrum exhibits partial narrowing upon  $^{11}\text{B}$  decoupling. For the calculations, a  $^1J(^{11}\text{B},^1\text{H})$  of 100 Hz has been used, in combination with  $^{11}\text{B}$  spin-lattice relaxation times  $T_{1\rho}$  of (a) 0.88 ms, deduced from the line width in the  $^{11}\text{B}\{^1\text{H}\}$  NMR spectrum, 361 Hz; (b) 0.09 ms; (c) 8.8 ms.

### III. X-ray crystallography

Crystals were grown by standard techniques from saturated solution using acetonitrile. A suitable crystal with dimensions 0.17×0.11×0.05 mm<sup>3</sup> was selected and mounted on a XtaLAB Synergy, Dualflex, HyPix diffractometer. Data were measured using  $\omega$  scans with Cu K $\alpha$  radiation. The structure was solved with the ShelXT solution program using dual methods and by using Olex2 1.5-ac5-024 as the graphical interface. The model was refined with olex2.refine 1.5-ac5-024 using full matrix least squares minimisation on F<sup>2</sup>.

**Table 1.** Crystal data and structure refinements

|                                    |                                                                                                                                             |
|------------------------------------|---------------------------------------------------------------------------------------------------------------------------------------------|
| Empirical formula                  | C <sub>36</sub> H <sub>31</sub> B <sub>2</sub> N <sub>3</sub>                                                                               |
| CCDC                               | 2307985                                                                                                                                     |
| Formula weight                     | 527.316                                                                                                                                     |
| Temperature                        | 100.00(11) K                                                                                                                                |
| Crystal system                     | monoclinic                                                                                                                                  |
| Space group                        | <i>P</i> 2 <sub>1</sub> / <i>n</i>                                                                                                          |
| Unit cell dimensions               | <i>a</i> = 23.5173(12) Å<br><i>b</i> = 9.9015(4) Å<br><i>c</i> = 26.2782(13) Å<br>$\alpha$ = 90°<br>$\beta$ = 109.964(6)°<br>$\gamma$ = 90° |
| Volume                             | 5751.3(5) Å <sup>3</sup>                                                                                                                    |
| Z                                  | 8                                                                                                                                           |
| Density (calculated)               | 1.218 g cm <sup>-3</sup>                                                                                                                    |
| Crystal size                       | 0.17×0.11×0.05 mm <sup>3</sup>                                                                                                              |
| $\Theta$ range for data collection | 4.00° to 75.70°                                                                                                                             |
| Reflections collected              | 42123                                                                                                                                       |
| Independent reflections            | 11296                                                                                                                                       |
| Completeness to $\Theta$ = 75.70   | 99.40%                                                                                                                                      |
| Goodness to fit on F <sup>2</sup>  | 1.0298                                                                                                                                      |
| Final R indices                    | R <sub>1</sub> = 0.0309                                                                                                                     |
| [I > 2 $\sigma$ (I)]               | wR <sub>2</sub> = 0.0747                                                                                                                    |
| R indices (all data)               | R <sub>1</sub> = 0.0482<br>wR <sub>2</sub> = 0.0812                                                                                         |
